## Expression and molecular profiles of the AlkB family in ovarian serous carcinoma

Yuan Cai<sup>1</sup>, Geting Wu<sup>1</sup>, Bi Peng<sup>1</sup>, Juanni Li<sup>1</sup>, Shuangshuang Zeng<sup>2</sup>, Yuanliang Yan<sup>2</sup>, Zhijie Xu<sup>1,3</sup>

<sup>1</sup>Department of Pathology, Xiangya Hospital, Central South University, Changsha 410008, Hunan, China

<sup>2</sup>Department of Pharmacy, Xiangya Hospital, Central South University, Changsha 410008, Hunan, China

<sup>3</sup>National Clinical Research Center for Geriatric Disorders, Xiangya Hospital, Central South University, Changsha 410008, Hunan, China

**Correspondence to:** Zhijie Xu; email: [xzj1322007@csu.edu.cn](mailto:xzj1322007@csu.edu.cn)

**Keywords:** ovarian serous carcinoma, AlkB family, expression profiles, infiltrating immune cells, methylation

**Received:** January 5, 2021

**Accepted:** February 8, 2021

**Published:** March 19, 2021

**Copyright:** © 2021 Cai et al. This is an open access article distributed under the terms of the [Creative Commons Attribution License](https://creativecommons.org/licenses/by/3.0/) (CC BY 3.0), which permits unrestricted use, distribution, and reproduction in any medium, provided the original author and source are credited.

### ABSTRACT

AlkB family of Fe (II) and  $\alpha$ -ketoglutarate-dependent dioxygenases plays essential roles in development of ovarian serous carcinoma (OV). However, the molecular profiles of AlkB family in OV have not been clarified. The results indicated that the expression of ALKBH1/3/5/8 and FTO was lower in OV patients while ALKBH2/4/6/7 expression was higher. There was a strong correlation between ALKBH5/7 and pathological stage of OV patients. Kaplan-Meier plotter revealed that OV patients with high ALKBH4 level showed longer overall survival (OS). However, patients with high levels of ALKBH5/6 and FTO showed shorter OS and progression-free survival (PFS). Genetic alterations using cBioPortal revealed that the alteration rates of FTO were the highest. We also found that the functions of AlkB family were linked to several cancer-associated signaling pathways, including chemokine receptor signaling. TIMER database indicated that the AlkB family had a strong relationship with the infiltration of six types of immune cells (macrophages, neutrophils, CD8+ T-cells, B-cells, CD4+ T-cells and dendritic cells). Next, DiseaseMeth databases revealed that the global methylation levels of ALKBH1/2/3/4/5/6/7/8 and FTO were all lower in OV patients. Thus, our findings will enhance the understanding of AlkB family in OV pathology, and provide novel insights into AlkB-targeted therapy for OV patients.

### INTRODUCTION

Ovarian cancer has raised worldwide concern because it has the highest fatality rate among cancers affecting only women [1–3]. WHO statistics indicate that 225,500 women are diagnosed with ovarian cancer, and 140,200 of them die from this malignant disease annually [4]. Women in developing countries and developed countries both suffer from a high death rate from ovarian cancer. Even in developed countries, a large number of patients cannot be diagnosed at an early stage [5]. Cumulative evidence has reported that ovarian serous carcinoma (OV) has the highest mortality among all histological subtypes of ovarian cancer. As shown in a recent study, we found that the survival data have not changed since 1980 in many areas [6–8]. Consequently,

molecular markers will play an essential role in diagnosing OV at an early stage and assist in the treatment of patients.

Accumulating statistics indicate that among a series of RNA modification adenosines, N6-methyladenosine (m6A) plays the most significant role in modulating numerous cellular processes of eukaryotes [9–11]. Currently, an increasing number of scientists are committed to exploring the relationship between m6A and cancers, comparing differences between various types of tumors [12–14]. At the same time, a recent study revealed that m6A is linked to the pathogenesis and development of ovarian cancer by regulating several targeted genes [15]. The main regulators of m6A RNA methylation include “writers”, “erasers” and

“readers”, which are named based on their biological functions. The AlkB family of Fe (II) and  $\alpha$ -ketoglutarate-dependent dioxygenases are “erasers” and play essential roles in RNA m6A modification [16, 17]. Furthermore, another recent study conducted by Jiang et al. indicated that the expression of ALKBH5 in ovarian cancer tissue is higher than that in normal tissue. Consequently, ALKBH expression is linked to modulating ovarian cancer [18]. In addition, ALKBH5 plays an essential role in the regulation of cancer cell proliferation and invasion [19]. However, the specific mechanisms of AlkB family members in OV development and progression still require further confirmation and research.

The aim of our study was to evaluate the biological significance of AlkB family members in OV patients using comprehensive bioinformatics databases (Supplementary Table 1).

## RESULTS

### Aberrant expression of the AlkB family in OV patients

We used the GEPIA databases to evaluate the mRNA expression levels of AlkB family members in OV tissues

and normal tissues. We found that the expression levels of ALKBH1, ALKBH3, ALKBH5, ALKBH8 and FTO were significantly downregulated in OV patients. However, the expression levels of ALKBH2, ALKBH4, ALKBH6 and ALKBH7 were higher in OV tissues than in normal tissues (Figure 1). When evaluating the relative levels of the AlkB family in OV tissues, we found that the expression of ALKBH7 was the highest, while that of ALKBH8 was the lowest (Figure 2).

Then, we analyzed the association between the expression profiles of the AlkB family and the pathological stages of OV patients. As shown in Figure 3, ALKBH5 expression ( $p = 0.00266$ ) displayed a negative correlation with pathological stage. In contrast, ALKBH7 expression ( $p = 0.0352$ ) displayed a positive correlation with pathological stage. These data suggested that aberrant expression of AlkB family members might participate in disease progression in OV patients.

### The prognostic value of the AlkB family in OV patients

Then, we used Kaplan-Meier plotter to assess the prognostic value of the AlkB family for patients with OV. The data of the OS curves are shown in Figure 4.

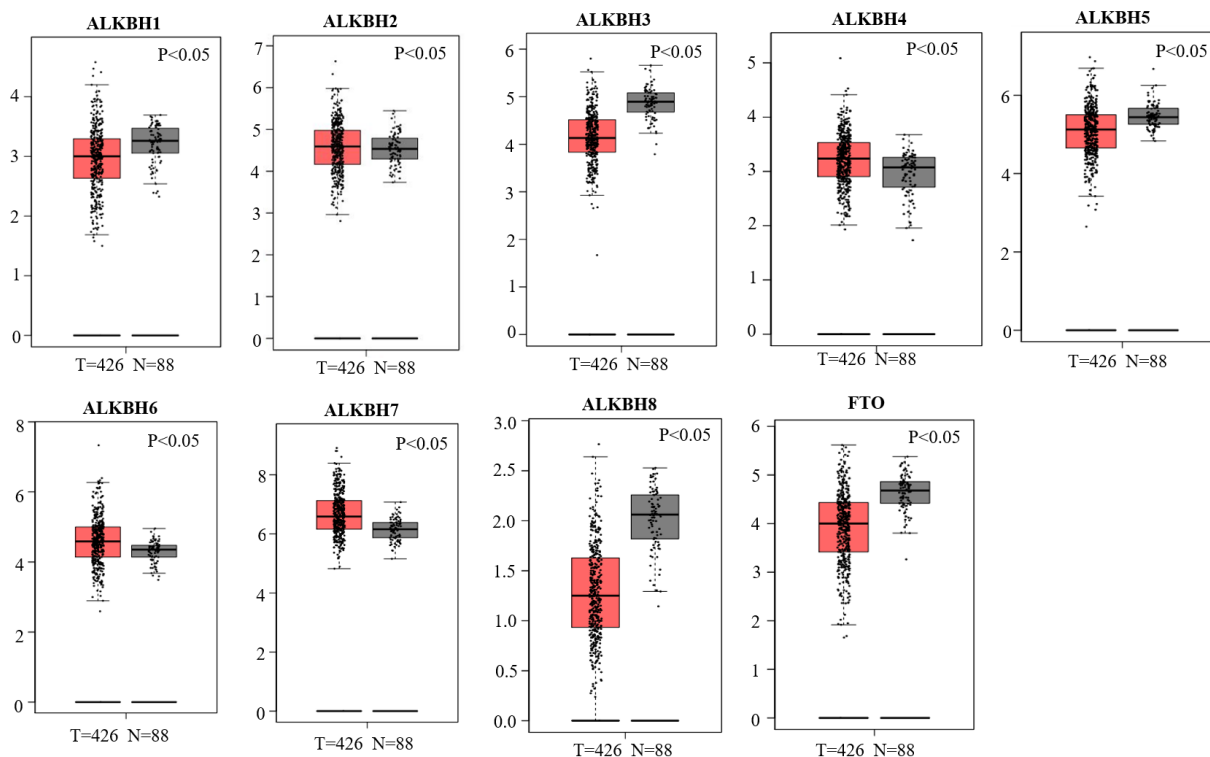

**Figure 1. Differential mRNA expression analysis of the AlkB family in OV and normal tissues.** The expression profiles were collected from the GEPIA databases.

We found that a high transcriptional level of ALKBH4 ( $p = 0.0027$ ) was highly related to a longer OS time. In addition, we also concluded that high transcriptional levels of ALKBH1 ( $p = 0.035$ ), ALKBH5 ( $p = 0.03$ ), ALKBH6 ( $p = 0.0052$ ) and FTO ( $p = 0.001$ ) had an important association with a shorter OS time. At the same time, we evaluated the prognostic value of the AlkB family on the PFS of OV patients. From Figure 5,

we know that low levels of ALKBH5 ( $p = 0.00053$ ), ALKBH6 ( $p = 9e-07$ ) and FTO ( $p = 0.00045$ ) have an important association with a longer PFS time.

### Genetic alteration of the AlkB family in OV patients

To further analyze the alteration profiles of AlkB family members in patients with OV, we conducted a series of

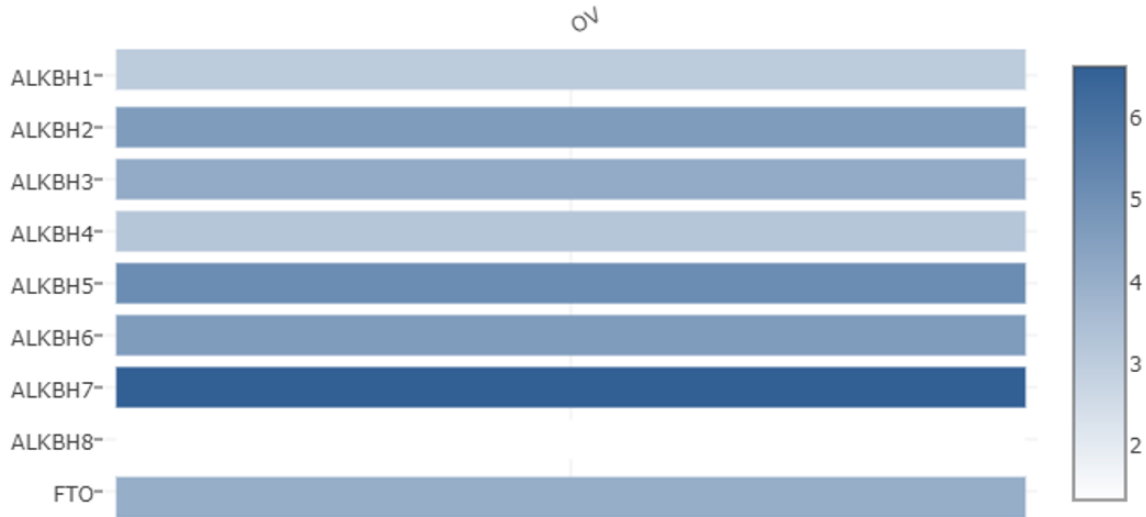

**Figure 2. The relative expression levels of the AlkB family in OV patients.** GEPIA databases were used to evaluate the relative expression levels of the AlkB family in OV patients.

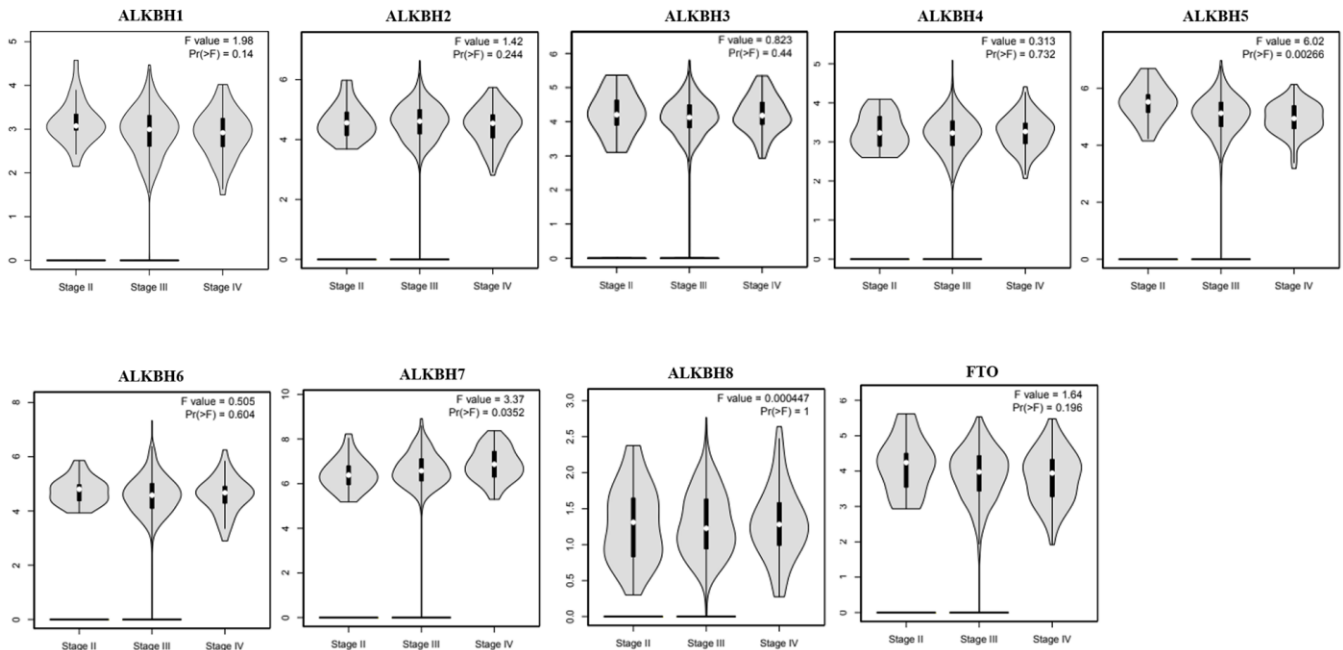

**Figure 3. The relationship between the expression of the AlkB family and the pathological stage of OV patients (GEPIA).** GEPIA databases were used to evaluate the correlations of the AlkB family with the pathological stage of OV patients.

surveys as follows. First, we evaluated the genetic alterations of the AlkB family by using the cBioPortal database. As shown in Figure 6A, we confirmed that the alternation rate of FTO was the highest in 25% of cases, whereas the lowest was for ALKBH7, which was only 1%. In addition, ALKBH1, ALKBH2, ALKBH3, ALKBH4, ALKBH5, ALKBH6 and ALKBH8

mutations occurred in 16, 7, 6, 12, 16, 16 and 8% of the samples, respectively (Figure 6A).

### Interaction analyses of the AlkB family in OV patients

Furthermore, we used STRING to evaluate the associated molecules of the AlkB family and found

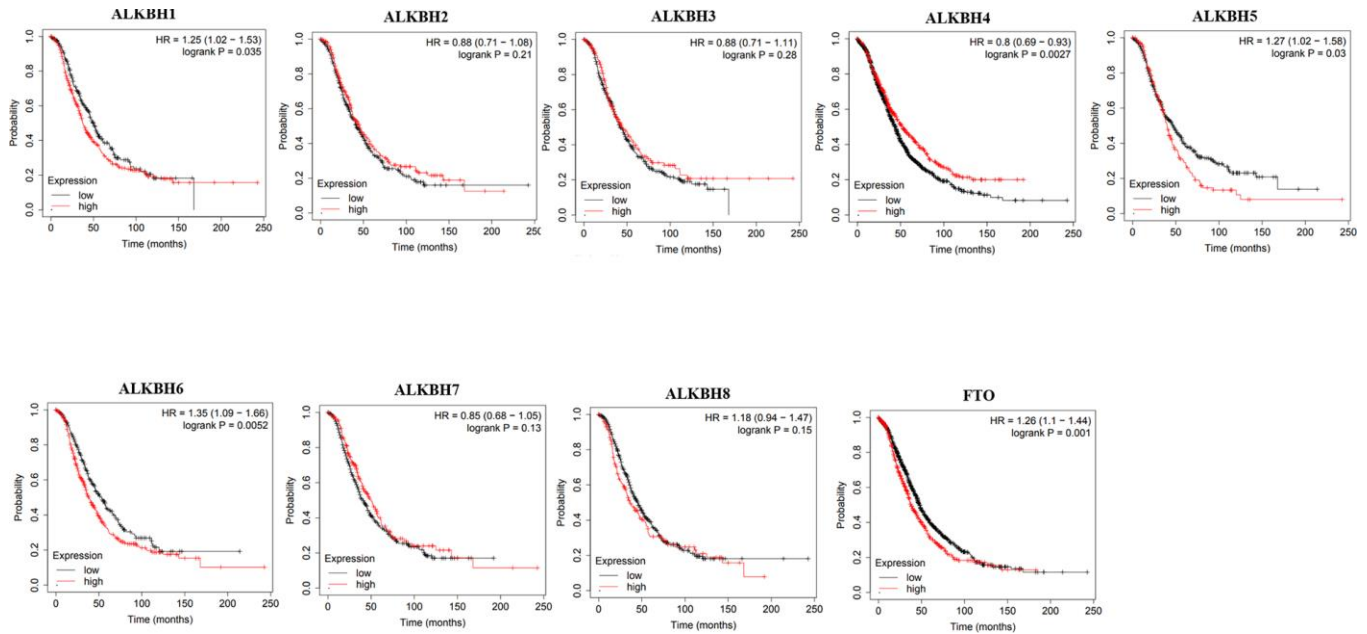

**Figure 4. The correlations of AlkB family expression with patients' OS.** These OS survival curves were collected from Kaplan-Meier plotter.

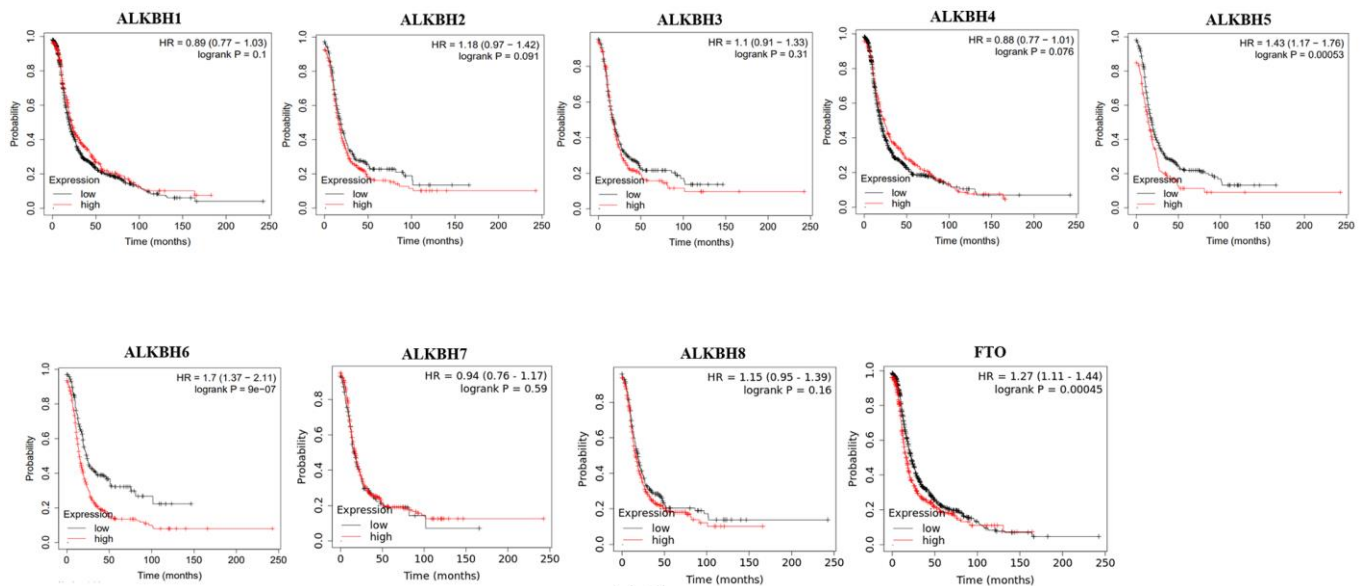

**Figure 5. The correlations of AlkB family expression with PFS in OV patients.** Kaplan-Meier plotter was used to assess the correlation of AlkB family members with the patients' PFS time.

that in the interactive network, 9 AlkB family members were all included and served as hub nodes (Figure 6B). At the same time, to explore the association between the AlkB family and other signaling pathway-associated biomarkers, we used GeneMANIA to find the functions of the AlkB family (ALKBH1, ALKBH2, ALKBH3, ALKBH4, ALKBH5, ALKBH6, ALKBH7, ALKBH8 and FTO) were associated with chemokine signaling pathways, including chemokine receptor binding and cytokine activity (Figure 6C).

Additionally, we used cBioPortal to extract the 150 most frequently altered genes that were significantly linked to the AlkB family in OV patients (Supplementary Table 2). The data indicated that several hub genes, such as COL1A1, COL1A2, COL3A1, FN1, COL5A1 and POSTN, were closely linked to the biological processes of AlkB family modulation in OV patients (Figure 6D).

### Functional enrichment analysis of the AlkB family

In our study, we applied the WebGestalt database to evaluate the biological functions of the AlkB family. As shown in the GO pathways (Figure 7A), we know that the most highly enriched biological process (BP) category was biological regulation, followed by metabolic process, response to stimulus, multicellular organismal process, cell communication, developmental process and localization. In the cellular component (CC) categories, membrane, nucleus, cytosol, protein-

containing complex, membrane-enclosed lumen, endomembrane system, vesicle, extracellular space, cell projection, and cytoskeleton were highly enriched. In the molecular function (MF) category, the AlkB family members were mainly enriched in protein binding, ion binding, nucleic acid binding, transferase activity and hydrolase activity. In addition, the KEGG pathway results are shown in Figure 7B. We can conclude from the picture that protein serine/threonine kinase activity, peptidyl-tyrosine modification, negative regulation of cellular component movement, positive regulation of neurogenesis, maintenance of location, regulation of transsynaptic signaling, leukocyte differentiation, neuronal cell body, gland development, gland development and covalent chromatin modification were strongly linked to the potential biological functions of the AlkB family in the occurrence and development of OV.

### Immune cell infiltration of the AlkB family

To explore the relationship between immune cell infiltration and the expression profiles of the AlkB family, we searched the information from the TIMER database. The expression of ALKBH1 was positively linked to the infiltration of macrophages (Cor = 0.177,  $p = 9.26e-05$ ), neutrophils (Cor = 0.143,  $p = 1.69e-03$ ) and dendritic cells (Cor = 0.119,  $p = 9.16e-03$ ) (Figure 8A). ALKBH2 expression had a positive relationship with the infiltration of CD8+ T cells (Cor = 0.09,  $p = 4.87e-02$ ) and B cells (Cor = 0.075,  $p = 1.02e-01$ ), whereas it

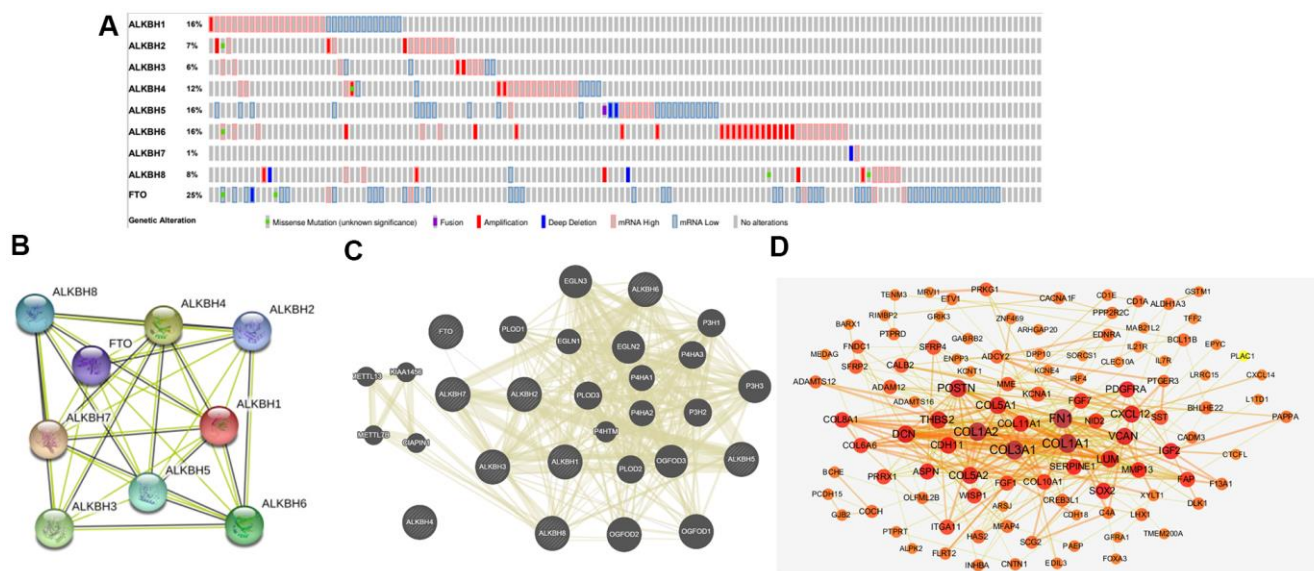

**Figure 6. Genetic alterations and interaction analyses of the AlkB family in OV patients.** (A) Genetic alteration of the AlkB family in OV patients analyzed with cBioPortal. (B) The interaction analysis of the AlkB family was evaluated by STRING. (C) Analysis of the interaction between the AlkB family and chemokine signaling-associated biomarkers. (D) The 150 most frequently altered genes identified from cBioPortal that are linked to the AlkB family in OV patients.

had a negative relationship with the infiltration of CD4+ T cells (Cor = -0.059, p = 1.93e-01) (Figure 8B). There was a positive correlation between ALKBH3 expression and the infiltration of B cells (Cor = 0.142, p = 1.77e-03), dendritic cells (Cor = 0.119, p = 8.87e-03) and neutrophils (Cor = 0.062, p = 1.73e-01) (Figure 8C). We concluded from Figure 8D that ALKBH4 expression was negatively associated with the infiltration of macrophages (Cor = -0.152, p = 8.21e-04), dendritic cells (Cor = -0.111, p = 1.50e-02) and neutrophils (Cor = -0.1, p = 2.91e-02). There was a negative correlation between ALKBH5 expression and the infiltration of CD8+ T cells (Cor = -0.172, p = 1.59e-04), neutrophils (Cor = -0.157, p = 5.45e-04) and dendritic cells (Cor = -0.14, p = 2.07e-03) (Figure 8E). We also found that the expression of ALKBH6 was positively related to the infiltration of macrophages (Cor = 0.232, p = 2.71e-07), CD4+ T cells (Cor = 0.125,

p = 6.04e-03) and neutrophils (Cor = 0.105, p = 2.08e-02) (Figure 8F). There was a positive correlation between ALKBH7 expression and the infiltration of CD8+ T cells (Cor = 0.139, p = 2.26e-03), dendritic cells (Cor = 0.085, p = 6.43e-02) and neutrophils (Cor = 0.069, p = 1.33e-01) (Figure 8G). There was a positive correlation between ALKBH8 expression and the infiltration of B cells (Cor = 0.148, p = 1.18e-03) and macrophages (Cor = 0.106, p = 1.97e-02) (Figure 8H). Additionally, the expression of FTO was positively linked to the infiltration of macrophages (Cor = 0.159, p = 4.83e-04) and negatively linked to the infiltration of CD4+ T cells (Cor = -0.083, p = 7.07e-02) (Figure 8I). At the same time, we analyzed the relationship between the expression of the AlkB family and the infiltration of immune cells (Table 1). The Cox proportional hazard model included the following confounding factors: B cells, CD8+ T cells, CD4+ T cells, macrophages,

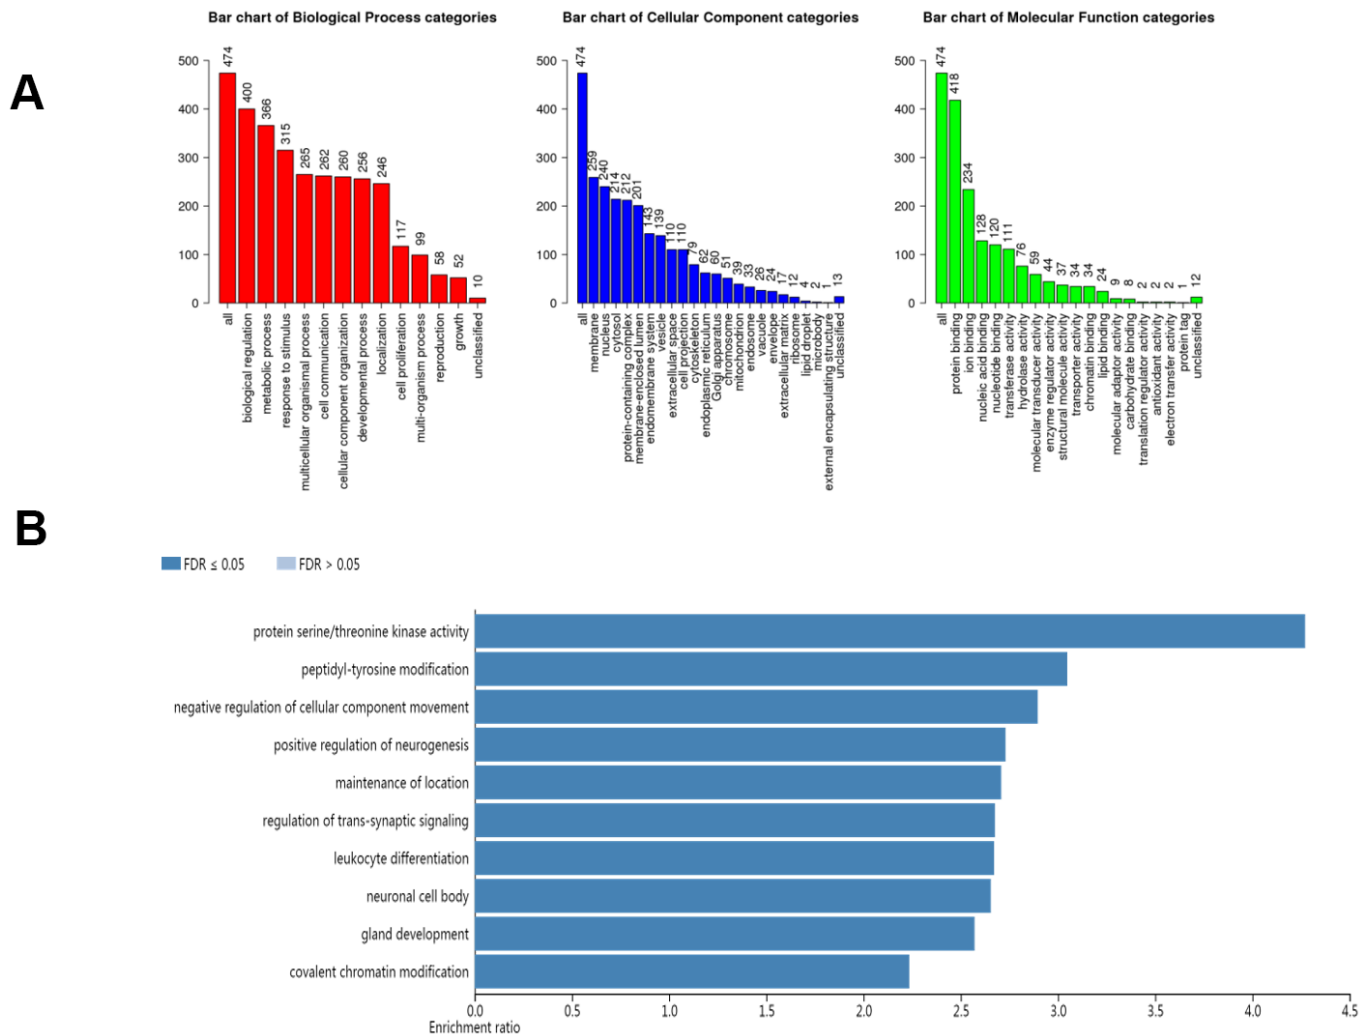

**Figure 7. The biological pathways of the AlkB family were evaluated by the WebGestalt database. (A)** Bar plot of GO enrichment in cellular components, biological processes, and molecular functions. **(B)** The bar plot of KEGG enrichment.

neutrophils, dendritics, ALKBH1, ALKBH2, ALKBH3, ALKBH4, ALKBH5, ALKBH6, ALKBH7, ALKBH8 and FTO. From Table 1, we found that CD4+ T cells ( $p = 0.000$ ) and macrophages ( $p = 0.007$ ) had a strong relationship with OV patient prognosis.

### Methylation level of the AlkB family

Then, we analyzed the methylation levels of the AlkB family by searching the DiseaseMeth database. We found that the methylation levels of ALKBH1

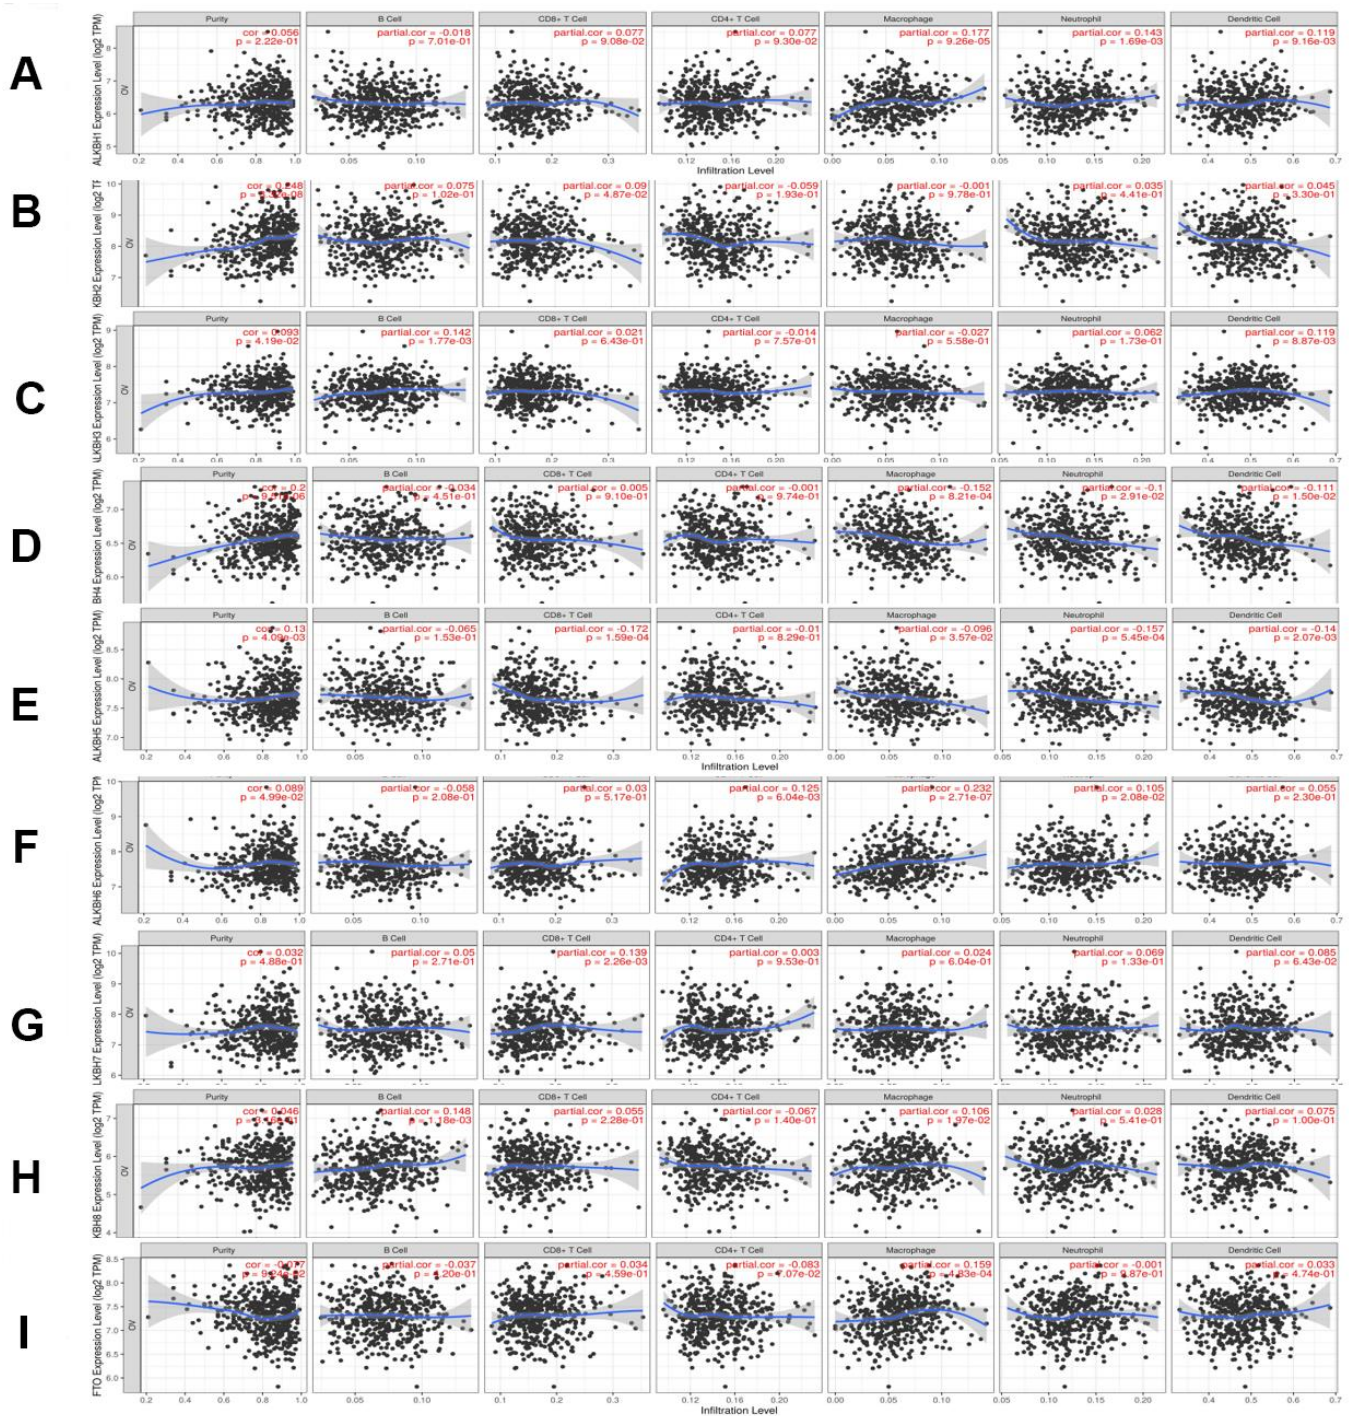

**Figure 8. The relationship between immune cell infiltration and the expression of the AlkB family.** The Timer database was used to analyze the effect of (A) ALKBH1, (B) ALKBH2, (C) ALKBH3, (D) ALKBH4, (E) ALKBH5, (F) ALKBH6, (G) ALKBH7, (H) ALKBH8 and (I) FTO on the abundance of immune cells in OV patients.

**Table 1. The cox proportional hazard model of AlkB family and six types of immune cells in OV patients from timer database.**

|            | Coef    | HR         | 95%CI_l | 95%CI_u      | P.value | Sig |
|------------|---------|------------|---------|--------------|---------|-----|
| B_cell     | -0.940  | 0.391      | 0.000   | 3.103130e+02 | 0.783   |     |
| CD8_Tcell  | -3.190  | 0.041      | 0.001   | 2.219000e+00 | 0.117   |     |
| CD4_Tcell  | -18.637 | 0.000      | 0.000   | 0.000000e+00 | 0.000   | *** |
| Macrophage | 8.116   | 3346.999   | 9.360   | 1.196836e+06 | 0.007   | **  |
| Neutrophil | 11.984  | 160162.297 | 13.497  | 1.900588e+09 | 0.012   | *   |
| Dendritic  | -3.508  | 0.030      | 0.000   | 5.193000e+00 | 0.182   |     |
| ALKBH1     | 0.001   | 1.001      | 0.787   | 1.272000e+00 | 0.996   |     |
| ALKBH2     | -0.079  | 0.924      | 0.751   | 1.137000e+00 | 0.457   |     |
| ALKBH3     | -0.154  | 0.857      | 0.638   | 1.152000e+00 | 0.307   |     |
| ALKBH4     | -0.289  | 0.749      | 0.492   | 1.139000e+00 | 0.177   |     |
| ALKBH5     | -0.327  | 0.721      | 0.513   | 1.014000e+00 | 0.060   | .   |
| ALKBH6     | 0.043   | 1.044      | 0.803   | 1.358000e+00 | 0.749   |     |
| ALKBH7     | -0.102  | 0.903      | 0.745   | 1.095000e+00 | 0.299   |     |
| ALKBH8     | 0.117   | 1.125      | 0.918   | 1.377000e+00 | 0.256   |     |
| FTO        | 0.175   | 1.191      | 0.895   | 1.584000e+00 | 0.230   |     |

( $p = 3.666e-05$ ), ALKBH2 ( $p = 3.971e-04$ ), ALKBH3 ( $p = 2.025e-01$ ), ALKBH4 ( $p = 1.035e-04$ ), ALKBH5 ( $p = 6.684e-03$ ), ALKBH6 ( $p = 2.458e-02$ ), ALKBH7 ( $p = 1.108e-02$ ), ALKBH8 ( $p = 4.837e-04$ ) and FTO ( $p = 3.028e-04$ ) were all lower in OV patients than in healthy people (Figure 9). These downregulated methylation values might explain their difference in expression levels to some extent.

## DISCUSSION

AlkB family members have recently been identified to be involved in the regulation of RNA m6A

modification. AlkB family members mainly function as demethylases [20]. Some reports have shown that ALKBH5 (AlkB homolog 5) has a strong correlation with the inhibition of cancer growth [21]. A study indicated that ALKBH2 is highly expressed in bladder cancer [22]. Furthermore, two research groups have demonstrated that ALKBH1 and ALKBH5 are related to glioblastoma [23, 24]. At the same time, ALKBH5 could serve as a tumor suppressor in the proliferation inhibition of HCC cells [25]. Previous study has shown that meclofenamic acid (MA) could serve as FTO inhibitor, which provided future directions of applying FTO inhibitors in the medicine [26]. Additionally, a

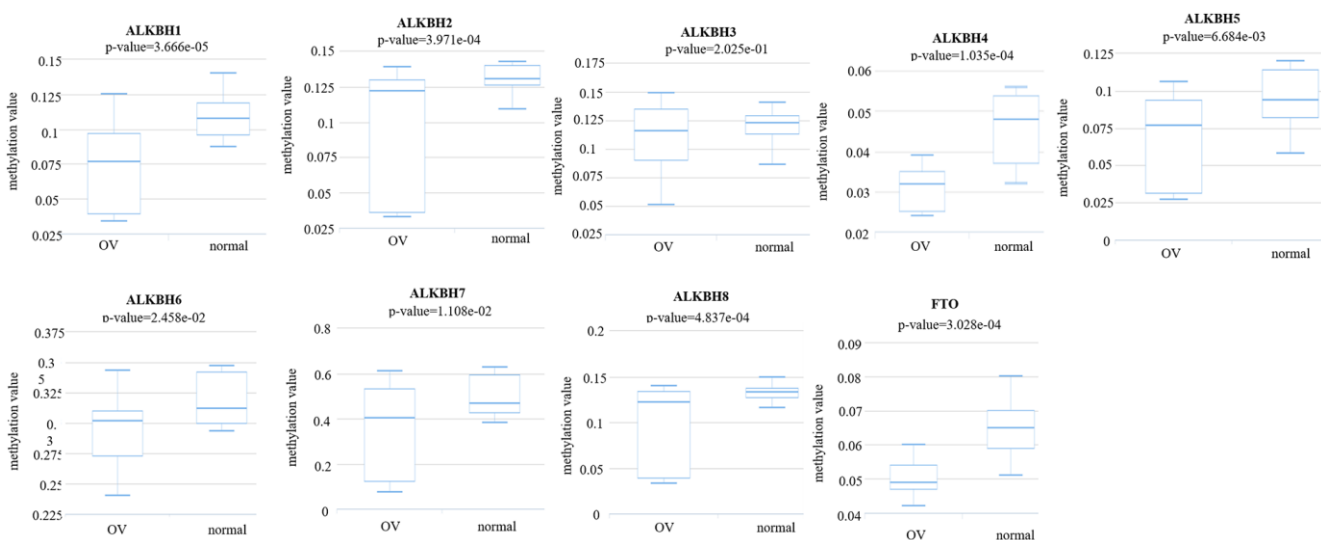

**Figure 9. The methylation levels of the AlkB family in OV tissues.** The methylation values of AlkB family members were evaluated using the DiseaseMeth database.



report demonstrated that pharmacological function of FTO inhibitor could slow down the self-renewal of leukemia stem cells [27]. However, the detailed functions and mechanisms of the AlkB family in OV have not been fully explored and explained.

In addition, a recent study demonstrated that the high expression of ALKBH5 played a significant role in the proliferation and invasion of OV cells [19]. Moreover, from the GEPIA database, we also concluded that the expression of the AlkB family is different in OV and normal tissues (upregulation of ALKBH2, ALKBH4, ALKBH6 and ALKBH7; downregulation of ALKBH1, ALKBH3, ALKBH5, ALKBH8 and FTO). Additionally, we also performed a correlation between the AlkB family and the patients' pathological stage. We found that the expression of ALKBH5 decreased as OV cancer progressed and that the expression of ALKBH7 increased as OV cancer progressed. OV patients with low levels of ALKBH1, ALKBH5, ALKBH6 and FTO had an association with longer OS curves. OV patients with low levels of ALKBH5, ALKBH6 and FTO had an association with better PFS curves. The results of these databases implied that the expression of the AlkB family is crucial for the progression of OV patients. However, more specific studies are needed to explore the expression and prognostic value of the AlkB family in OV patients.

We explored the biological functions of the AlkB family by analyzing the GO and the KEGG pathways. These two enrichment pathways are targeted at exploring the functional meanings of genes at the molecular level and the biological interpretation of genome sequences [28–30]. Through this study, we found that the biological functions of the AlkB family were mainly linked to posttranslational modification pathways, such as protein serine/threonine kinase activity and peptidyl-tyrosine modification. A previous study has shown that tyrosine modification plays a significant role in the regulation of gene expression and the therapeutic response of ovarian cancer [31]. Accordingly, from other previous studies, enrichment pathway analysis revealed that protein serine/threonine kinase activity could also participate in the therapeutic response of epithelial ovarian cancer [32, 33]. Therefore, we can conclude that the AlkB family may be involved in the progression of OV by regulating protein posttranslational modification pathways.

At present, there are many studies that indicate that RNA m6A methylation could modulate immunity, regulate tumor inflammation, and predict patient outcomes [34, 35]. In addition, some studies have revealed that immune cells could have important effects on the treatment efficacy of human cancers, such as in

clinical immunotherapy [36, 37]. In our study, we found that the expression of the AlkB family is significantly linked to the infiltration of CD4+ T cells, macrophages and neutrophils. These data indicated that the AlkB family could regulate the infiltration of immune cells, which may affect the immune response of infiltrating immune cells in the tumor environment.

However, our study still has some limitations. Firstly, although the study demonstrated that molecular profiles of the AlkB family would be a potential indicator of OV, the statistics we analyzed were all from the databases, lacking experimental researches. Secondly, the study did not conduct some survey concerning the therapeutic outcome of OV patients, we still need further studies to validate the therapeutic significance of the AlkB family. Thirdly, because of inconsistent data-sets used by the databases, some contradictory data need to be further clarified. Finally, it is important to explore more prognostic effects of OV patients in order to improve the application value of the AlkB family.

In conclusion, our study evaluated the molecular profiles of the AlkB family in patients with OV. Moreover, the findings in this study might also be beneficial for the development of better diagnostic and treatment methods for OV patients to improve their prognosis.

## MATERIALS AND METHODS

### GEPIA

Gene Expression Profiling Interactive Analysis (GEPIA) is a database that is designed to help end users fully understand gene expression from a more holistic perspective [38]. We used “Single Gene Analysis” in GEPIA to evaluate the expression profiles of AlkB family members in OV tissues compared with normal tissues based on the data from TCGA and GTEx. We also used this database to evaluate the roles of the AlkB family in pathological stage, prognosis and so on. We set p-values at 0.05.

### Kaplan-Meier plotter

Kaplan-Meier plotter is a database assessing the relationship between gene expression and the survival trend of various cancer patients [39]. In our study, we evaluated the prognosis of OV patients by means of overall survival (OS) and progression-free survival (PFS) curves. Additionally, we could identify the high expression and low expression groups from the figures, and it showed statistical significance if the p-value < 0.05.

## cBioPortal

cBioPortal includes statistics on over 200 cancer genomics and provides a user-friendly analysis strategy concerning gene-disease associations [40]. In this study, we analyzed the coexpression profiles and genetic alterations of the AlkB family in OV tissues by searching cBioPortal.

## STRING

STRING was applied to explore potential protein-protein interactions (PPIs). Furthermore, this database provides all resources concerning the interactive network of multiple proteins [41]. At the same time, we analyzed the AlkB family member-associated PPI network using STRING and Cytoscape [42].

## GeneMANIA

GeneMANIA has been applied in scientific research for many years and is very convenient for identifying protein-protein interactive networks [43]. Using GeneMANIA, we successfully identified the genes associated with the AlkB family.

## WebGestalt

WebGestalt aims to provide users with a better understanding of gene interpretation. Researchers can obtain enrichment results from this database [44]. In our study, we analyzed several enrichment pathways associated with the AlkB family in OV disease. The main two enrichment pathways are Gene Ontology (GO) and Kyoto Encyclopedia of Genes and Genomes (KEGG).

## Timer

Timer is used to evaluate the connection between infiltrating immune cells and cancer cells, which could provide more rational strategies for an improved therapeutic response and prognosis [45]. We mainly performed correlation analysis between OV and immune cells using the Timer database.

## DiseaseMeth

DiseaseMeth collects the database of DNA methylation, which has a strong relationship with gene expression and disease incidence [46]. In our study, we evaluated the relationship between the expression of the AlkB family and methylation levels. We also analyzed whether methylation levels of the AlkB family have a potential influence on the survival of OV patients.

## AUTHOR CONTRIBUTIONS

Conception and design: Y Yan and Z Xu. Writing, review, and/or revision of the manuscript: Y Cai, GT Wu and B Peng. Administrative, technical, or material support: J Li and S Zeng. All authors approved final version of manuscript.

## CONFLICTS OF INTEREST

This research was conducted in the absence of any commercial or financial relationships that could be construed as a potential conflict of interest.

## FUNDING

This study is supported by grants from the National Natural Science Foundation of China (81803035), the China Postdoctoral Science Foundation (2020M672521), the Natural Science Foundation of Hunan Province (2020JJ5934, 2019JJ50932), and the Postdoctoral Science Foundation of Central South University (248485).

## REFERENCES

1. Hodgson A, Turashvili G. Pathology of hereditary breast and ovarian cancer. *Front Oncol.* 2020; 10:531790. <https://doi.org/10.3389/fonc.2020.531790> PMID:33117676
2. Nimmagadda S, Penet MF. Ovarian cancer targeted theranostics. *Front Oncol.* 2020; 9:1537. <https://doi.org/10.3389/fonc.2019.01537> PMID:32039018
3. Yousefi M, Dehghani S, Nosrati R, Ghanei M, Salmaninejad A, Rajaie S, Hasanzadeh M, Pasdar A. Current insights into the metastasis of epithelial ovarian cancer - hopes and hurdles. *Cell Oncol (Dordr).* 2020; 43:515–38. <https://doi.org/10.1007/s13402-020-00513-9> PMID:32418122
4. Lisio MA, Fu L, Goyeneche A, Gao ZH, Telleria C. High-grade serous ovarian cancer: basic sciences, clinical and therapeutic standpoints. *Int J Mol Sci.* 2019; 20:952. <https://doi.org/10.3390/ijms20040952> PMID:30813239
5. Áyen Á, Jiménez Martínez Y, Marchal JA, Boulaiz H. Recent progress in gene therapy for ovarian cancer. *Int J Mol Sci.* 2018; 19:1930. <https://doi.org/10.3390/ijms19071930> PMID:29966369
6. Ferraresi A, Girone C, Esposito A, Vidoni C, Vallino L, Secomandi E, Dhanasekaran DN, Isidoro C. How

- autophagy shapes the tumor microenvironment in ovarian cancer. *Front Oncol.* 2020; 10:599915.  
<https://doi.org/10.3389/fonc.2020.599915>  
PMID:33364196
7. Yang Y, Yang Y, Yang J, Zhao X, Wei X. Tumor microenvironment in ovarian cancer: function and therapeutic strategy. *Front Cell Dev Biol.* 2020; 8:758.  
<https://doi.org/10.3389/fcell.2020.00758>  
PMID:32850861
  8. Huo X, Sun H, Qian Q, Ma X, Peng P, Yu M, Zhang Y, Yang J, Cao D, Gui T, Shen K. CYP27B1 downregulation: a new molecular mechanism regulating EZH2 in ovarian cancer tumorigenicity. *Front Cell Dev Biol.* 2020; 8:561804.  
<https://doi.org/10.3389/fcell.2020.561804>  
PMID:33163485
  9. Xu Z, Peng B, Cai Y, Wu G, Huang J, Gao M, Guo G, Zeng S, Gong Z, Yan Y. N6-methyladenosine RNA modification in cancer therapeutic resistance: current status and perspectives. *Biochem Pharmacol.* 2020; 182:114258.  
<https://doi.org/10.1016/j.bcp.2020.114258>  
PMID:33017575
  10. Zhang M, Zhai Y, Zhang S, Dai X, Li Z. Roles of N6-Methyladenosine (m<sup>6</sup>A) in Stem Cell Fate Decisions and Early Embryonic Development in Mammals. *Front Cell Dev Biol.* 2020; 8:782  
<https://doi.org/10.3389/fcell.2020.00782>  
PMID:32850871
  11. Yang DD, Chen ZH, Yu K, Lu JH, Wu QN, Wang Y, Ju HQ, Xu RH, Liu ZX, Zeng ZL. METTL3 promotes the progression of gastric cancer via targeting the MYC pathway. *Front Oncol.* 2020; 10:115.  
<https://doi.org/10.3389/fonc.2020.00115>  
PMID:32175271
  12. Liu ZX, Li LM, Sun HL, Liu SM. Link between m6A modification and cancers. *Front Bioeng Biotechnol.* 2018; 6:89.  
<https://doi.org/10.3389/fbioe.2018.00089>  
PMID:30062093
  13. Yang Z, Wang T, Wu D, Min Z, Tan J, Yu B. RNA N6-methyladenosine reader IGF2BP3 regulates cell cycle and angiogenesis in colon cancer. *J Exp Clin Cancer Res.* 2020; 39:203.  
<https://doi.org/10.1186/s13046-020-01714-8>  
PMID:32993738
  14. Zhou X, Han J, Zhen X, Liu Y, Cui Z, Yue Z, Ding L, Xu S. Analysis of genetic alteration signatures and prognostic values of m6A regulatory genes in head and neck squamous cell carcinoma. *Front Oncol.* 2020; 10:718.  
<https://doi.org/10.3389/fonc.2020.00718>  
PMID:32547941
  15. He L, Li H, Wu A, Peng Y, Shu G, Yin G. Functions of N6-methyladenosine and its role in cancer. *Mol Cancer.* 2019; 18:176.  
<https://doi.org/10.1186/s12943-019-1109-9>  
PMID:31801551
  16. Fan L, Lin Y, Lei H, Shu G, He L, Yan Z, Rihan H, Yin G. A newly defined risk signature, consisting of three m<sup>6</sup>A RNA methylation regulators, predicts the prognosis of ovarian cancer. *Aging (Albany NY).* 2020; 12:18453–75.  
<https://doi.org/10.18632/aging.103811>  
PMID:32950970
  17. Liu T, Wei Q, Jin J, Luo Q, Liu Y, Yang Y, Cheng C, Li L, Pi J, Si Y, Xiao H, Li L, Rao S, et al. The m6A reader YTHDF1 promotes ovarian cancer progression via augmenting EIF3C translation. *Nucleic Acids Res.* 2020; 48:3816–31.  
<https://doi.org/10.1093/nar/gkaa048>  
PMID:31996915
  18. Jiang Y, Wan Y, Gong M, Zhou S, Qiu J, Cheng W. RNA demethylase ALKBH5 promotes ovarian carcinogenesis in a simulated tumour microenvironment through stimulating NF-κB pathway. *J Cell Mol Med.* 2020; 24:6137–48.  
<https://doi.org/10.1111/jcmm.15228> PMID:32329191
  19. Zhu H, Gan X, Jiang X, Diao S, Wu H, Hu J. ALKBH5 inhibited autophagy of epithelial ovarian cancer through miR-7 and BCL-2. *J Exp Clin Cancer Res.* 2019; 38:163.  
<https://doi.org/10.1186/s13046-019-1159-2>  
PMID:30987661
  20. Zhao W, Qi X, Liu L, Ma S, Liu J, Wu J. Epigenetic regulation of m<sup>6</sup>A modifications in human cancer. *Mol Ther Nucleic Acids.* 2020; 19:405–12.  
<https://doi.org/10.1016/j.omtn.2019.11.022>  
PMID:31887551
  21. Panneerdoss S, Eedunuri VK, Yadav P, Timilsina S, Rajamanickam S, Viswanadhapalli S, Abdelfattah N, Onyeagucha BC, Cui X, Lai Z, Mohammad TA, Gupta YK, Huang TH, et al. Cross-talk among writers, readers, and erasers of m<sup>6</sup>A regulates cancer growth and progression. *Sci Adv.* 2018; 4:eaar8263.  
<https://doi.org/10.1126/sciadv.aar8263>  
PMID:30306128
  22. Fujii T, Shimada K, Anai S, Fujimoto K, Konishi N. ALKBH2, a novel AlkB homologue, contributes to human bladder cancer progression by regulating MUC1 expression. *Cancer Sci.* 2013; 104:321–27.  
<https://doi.org/10.1111/cas.12089> PMID:23279696
  23. Zhang S, Zhao BS, Zhou A, Lin K, Zheng S, Lu Z, Chen Y, Sulman EP, Xie K, Böglér O, Majumder S, He C, Huang S. m<sup>6</sup>A demethylase ALKBH5 maintains tumorigenicity of glioblastoma stem-like cells by sustaining FOXM1

- expression and cell proliferation program. *Cancer Cell*. 2017; 31:591–606.e6.  
<https://doi.org/10.1016/j.ccell.2017.02.013>  
 PMID:28344040
24. Xie Q, Wu TP, Gimple RC, Li Z, Prager BC, Wu Q, Yu Y, Wang P, Wang Y, Gorkin DU, Zhang C, Dowiak AV, Lin K, et al. N<sup>6</sup>-methyladenine DNA modification in glioblastoma. *Cell*. 2018; 175:1228–43.e20.  
<https://doi.org/10.1016/j.ccell.2018.10.006>  
 PMID:30392959
25. Chen Y, Zhao Y, Chen J, Peng C, Zhang Y, Tong R, Cheng Q, Yang B, Feng X, Lu Y, Xie H, Zhou L, Wu J, Zheng S. ALKBH5 suppresses malignancy of hepatocellular carcinoma via m<sup>6</sup>A-guided epigenetic inhibition of LYPD1. *Mol Cancer*. 2020; 19:123.  
<https://doi.org/10.1186/s12943-020-01239-w>  
 PMID:32772918
26. Huang Y, Yan J, Li Q, Li J, Gong S, Zhou H, Gan J, Jiang H, Jia GF, Luo C, Yang CG. Meclofenamic acid selectively inhibits FTO demethylation of m6A over ALKBH5. *Nucleic Acids Res*. 2015; 43:373–84.  
<https://doi.org/10.1093/nar/gku1276> PMID:25452335
27. Su R, Dong L, Li Y, Gao M, Han L, Wunderlich M, Deng X, Li H, Huang Y, Gao L, Li C, Zhao Z, Robinson S, et al. Targeting FTO suppresses cancer stem cell maintenance and immune evasion. *Cancer Cell*. 2020; 38:79–96.e11.  
<https://doi.org/10.1016/j.ccell.2020.04.017>  
 PMID:32531268
28. The Gene Ontology Consortium. The Gene Ontology Resource: 20 years and still GOing strong. *Nucleic Acids Res*. 2019; 47:D330–38.  
<https://doi.org/10.1093/nar/gky1055> PMID:30395331
29. Kanehisa M, Furumichi M, Tanabe M, Sato Y, Morishima K. KEGG: new perspectives on genomes, pathways, diseases and drugs. *Nucleic Acids Res*. 2017; 45:D353–61.  
<https://doi.org/10.1093/nar/gkw1092> PMID:27899662
30. Kanehisa M, Sato Y, Furumichi M, Morishima K, Tanabe M. New approach for understanding genome variations in KEGG. *Nucleic Acids Res*. 2019; 47:D590–95.  
<https://doi.org/10.1093/nar/gky962> PMID:30321428
31. Yu Y, Suryo Rahmanto Y, Shen YA, Ardighieri L, Davidson B, Gaillard S, Ayhan A, Shi X, Xuan J, Wang TL, Shih IM. Spleen tyrosine kinase activity regulates epidermal growth factor receptor signaling pathway in ovarian cancer. *EBioMedicine*. 2019; 47:184–94.  
<https://doi.org/10.1016/j.ebiom.2019.08.055>  
 PMID:31492560
32. Maoz A, Ciccone MA, Matsuzaki S, Coleman RL, Matsuo K. Emerging serine-threonine kinase inhibitors for treating ovarian cancer. *Expert Opin Emerg Drugs*. 2019; 24:239–53.  
<https://doi.org/10.1080/14728214.2019.1696773>  
 PMID:31755325
33. Maoz A, Matsuo K, Ciccone MA, Matsuzaki S, Klar M, Roman LD, Sood AK, Gershenson DM. Molecular pathways and targeted therapies for Malignant ovarian germ cell tumors and sex cord-stromal tumors: a contemporary review. *Cancers (Basel)*. 2020; 12:1398.  
<https://doi.org/10.3390/cancers12061398>  
 PMID:32485873
34. Zhang B, Wu Q, Li B, Wang D, Wang L, Zhou YL. m<sup>6</sup>A regulator-mediated methylation modification patterns and tumor microenvironment infiltration characterization in gastric cancer. *Mol Cancer*. 2020; 19:53.  
<https://doi.org/10.1186/s12943-020-01170-0>  
 PMID:32164750
35. Han D, Liu J, Chen C, Dong L, Liu Y, Chang R, Huang X, Liu Y, Wang J, Dougherty U, Bissonnette MB, Shen B, Weichselbaum RR, et al. Anti-tumour immunity controlled through mRNA m<sup>6</sup>A methylation and YTHDF1 in dendritic cells. *Nature*. 2019; 566:270–74.  
<https://doi.org/10.1038/s41586-019-0916-x>  
 PMID:30728504
36. Andrejeva G, Rathmell JC. Similarities and distinctions of cancer and immune metabolism in inflammation and tumors. *Cell Metab*. 2017; 26:49–70.  
<https://doi.org/10.1016/j.cmet.2017.06.004>  
 PMID:28683294
37. Yarchoan M, Johnson BA 3rd, Lutz ER, Laheru DA, Jaffee EM. Targeting neoantigens to augment antitumour immunity. *Nat Rev Cancer*. 2017; 17:209–22.  
<https://doi.org/10.1038/nrc.2016.154>  
 PMID:28233802
38. Tang Z, Kang B, Li C, Chen T, Zhang Z. GEPIA2: an enhanced web server for large-scale expression profiling and interactive analysis. *Nucleic Acids Res*. 2019; 47:W556–60.  
<https://doi.org/10.1093/nar/gkz430>  
 PMID:31114875
39. Györfy B, Györfy A, Tulassay Z. [The problem of multiple testing and solutions for genome-wide studies]. *Orv Hetil*. 2005; 146:559–63.  
 PMID:15853065
40. Cerami E, Gao J, Dogrusoz U, Gross BE, Sumer SO, Aksoy BA, Jacobsen A, Byrne CJ, Heuer ML, Larsson E, Antipin Y, Reva B, Goldberg AP, et al. The cBio cancer genomics portal: an open platform for exploring multidimensional cancer genomics data. *Cancer Discov*. 2012; 2:401–04.

<https://doi.org/10.1158/2159-8290.CD-12-0095>

PMID:[22588877](https://pubmed.ncbi.nlm.nih.gov/22588877/)

41. Szklarczyk D, Gable AL, Lyon D, Junge A, Wyder S, Huerta-Cepas J, Simonovic M, Doncheva NT, Morris JH, Bork P, Jensen LJ, Mering CV. STRING v11: protein-protein association networks with increased coverage, supporting functional discovery in genome-wide experimental datasets. *Nucleic Acids Res.* 2019; 47:D607–13.  
<https://doi.org/10.1093/nar/gky1131> PMID:[30476243](https://pubmed.ncbi.nlm.nih.gov/30476243/)
42. Otasek D, Morris JH, Bouças J, Pico AR, Demchak B. Cytoscape automation: empowering workflow-based network analysis. *Genome Biol.* 2019; 20:185.  
<https://doi.org/10.1186/s13059-019-1758-4> PMID:[31477170](https://pubmed.ncbi.nlm.nih.gov/31477170/)
43. Warde-Farley D, Donaldson SL, Comes O, Zuberi K, Badrawi R, Chao P, Franz M, Grouios C, Kazi F, Lopes CT, Maitland A, Mostafavi S, Montojo J, et al. The GeneMANIA prediction server: biological network integration for gene prioritization and predicting gene function. *Nucleic Acids Res.* 2010; 38:W214–20.
44. Liao Y, Wang J, Jaehnig EJ, Shi Z, Zhang B. WebGestalt 2019: gene set analysis toolkit with revamped UIs and APIs. *Nucleic Acids Res.* 2019; 47:W199–205.  
<https://doi.org/10.1093/nar/gkz401> PMID:[31114916](https://pubmed.ncbi.nlm.nih.gov/31114916/)
45. Li T, Fu J, Zeng Z, Cohen D, Li J, Chen Q, Li B, Liu XS. TIMER2.0 for analysis of tumor-infiltrating immune cells. *Nucleic Acids Res.* 2020; 48:W509–14.  
<https://doi.org/10.1093/nar/gkaa407> PMID:[32442275](https://pubmed.ncbi.nlm.nih.gov/32442275/)
46. Xiong Y, Wei Y, Gu Y, Zhang S, Lyu J, Zhang B, Chen C, Zhu J, Wang Y, Liu H, Zhang Y. DiseaseMeth version 2.0: a major expansion and update of the human disease methylation database. *Nucleic Acids Res.* 2017; 45:D888–95.  
<https://doi.org/10.1093/nar/gkw1123> PMID:[27899673](https://pubmed.ncbi.nlm.nih.gov/27899673/)

## SUPPLEMENTARY MATERIALS

### Supplementary Tables

Please browse Full Text version to see the data of Supplementary Table 2.

**Supplementary Table 1. The main databases applied to evaluate the expression and functions of AlkB family in the biological process of ovarian serous carcinoma.**

| Databases            | Authors                | Publication date | Samples | URL                                                                                                     |
|----------------------|------------------------|------------------|---------|---------------------------------------------------------------------------------------------------------|
| GEPIA2               | Tang Z. et al.         | 2019             | Tissues | <a href="http://gepia.cancer-pku.cn/">http://gepia.cancer-pku.cn/</a>                                   |
| Kaplan-Meier plotter | Gyorffy B. et al.      | 2005             | Tissues | <a href="http://kmplot.com/analysis/">http://kmplot.com/analysis/</a>                                   |
| cBioPortal           | Cerami E. et al.       | 2012             | Tissues | <a href="http://www.cbioportal.org/">http://www.cbioportal.org/</a>                                     |
| STRING v11           | Szklarczyk D. et al.   | 2019             | -       | <a href="https://string-db.org/">https://string-db.org/</a>                                             |
| GeneMANIA            | Warde-Farley D. et al. | 2010             | -       | <a href="http://genemania.org/">http://genemania.org/</a>                                               |
| WebGestalt           | Liao Y. et al.         | 2019             | -       | <a href="http://webgestalt.org/">http://webgestalt.org/</a>                                             |
| Timer2.0             | Li T. et al.           | 2020             | Tissues | <a href="https://cistrome.shinyapps.io/timer/">https://cistrome.shinyapps.io/timer/</a>                 |
| DiseaseMeth2.0       | Xiong Y. et al.        | 2017             | Tissues | <a href="http://bio-bigdata.hrbmu.edu.cn/diseasemeth/">http://bio-bigdata.hrbmu.edu.cn/diseasemeth/</a> |

GEPIA: Gene expression profiling interactive analysis; WebGestalt: the web-based GENE SeT ANALYSIS Toolkit.

**Supplementary Table 2. The database of cBioportal applied to search the altered genes of the AlkB family in tissues of ovarian serous carcinoma.**
